# Supplementary material for: A comprehensive portrait of the venom of the giant red bull ant, Myrmecia gulosa, reveals a hyperdiverse hymenopteran toxin gene family
Source: PubMed Central journal article supplement — Sci Adv. 2018 Sep 12;4(9):eaau4640. doi: 10.1126/sciadv.aau4640 (PMC6135544; doi:10.1126/sciadv.aau4640), 2018-09-12
Supplement: aau4640_SM.pdf [file aau4640_SM.pdf]

## Supplementary Materials for

### **A comprehensive portrait of the venom of the giant red bull ant, *Myrmecia gulosa*, reveals a hyperdiverse hymenopteran toxin gene family**

Samuel D. Robinson\*, Alexander Mueller, Daniel Clayton, Hana Starobova,  
Brett R. Hamilton, Richard J. Payne, Irina Vetter,  
Glenn F. King, Eivind A. B. Undheim\*

\*Corresponding author. Email: [sam.robinson@uq.edu.au](mailto:sam.robinson@uq.edu.au) (S.D.R.); [e.undheim@uq.edu.au](mailto:e.undheim@uq.edu.au) (E.A.B.U.)

Published 12 September 2018, *Sci. Adv.* **4**, eaau4640 (2018)  
DOI: 10.1126/sciadv.aau4640

#### **The PDF file includes:**

Supplementary Materials and Methods

Results

Fig. S1. MALDI-MS analysis of *M. gulosa* venom apparatus.

Fig. S2. Coelution of native (purified from venom) and synthetic MIITX<sub>1</sub>-Mg1a.

Fig. S3. MIITX<sub>1</sub>-Mg1a–induced changes in paw withdrawal.

Table S1. Venom- or toxin-associated annotation of nonvenom component transcripts.

Table S2. Assessment of antimicrobial, cytotoxic and hemolytic activity of MIITX<sub>1</sub>-Mg1a.

#### **Other Supplementary Material for this manuscript includes the following:**

(available at [advances.sciencemag.org/cgi/content/full/4/9/eaau4640/DC1](https://advances.sciencemag.org/cgi/content/full/4/9/eaau4640/DC1))

Movie S1 (.mov format). Collection of venom from *M. gulosa*.

## Supplementary Materials and Methods

### Antimicrobial and cytotoxicity assays

Antimicrobial and cytotoxicity assays were performed by CO-ADD (The Community for Antimicrobial Drug Discovery). Briefly, growth inhibition of all bacterial strains was determined by measuring absorbance at 600 nm, growth inhibition of *C. albicans* was determined by measuring absorbance at 530 nm, and growth inhibition of *C. neoformans* was determined by measuring the difference in absorbance between 600 and 570 nm, after the addition of resazurin (0.001% final concentration) and incubation at 35°C for an additional 2 h. Growth inhibition of HEK293 cells was determined by measuring fluorescence (excitation 530/10 nm, emission 590/10 nm) after the addition of resazurin (25 µg/mL final concentration) and incubation at 37°C and 5% CO<sub>2</sub>, for an additional 3 h. Percentage growth inhibition was calculated using negative controls (media only) and positive controls (no peptide). For the haemolytic activity assay, human whole blood was washed three times with 3 volumes of 0.9% NaCl and then resuspended in 0.9% NaCl to a concentration of  $0.5 \times 10^8$  cells/mL. Cells were incubated for 1 h at 37°C with or without the peptide. After incubation, plates were centrifuged at 1000 g for 10 min to pellet cells and debris and haemolysis determined by measuring the supernatant absorbance at 405 nm. Minimum inhibitory concentration (MIC), CC<sub>50</sub> (concentration at 50% cytotoxicity) and HC<sub>50</sub> (concentration at 50% haemolytic activity) values were calculated by curve fitting the inhibition values versus log(concentration) using a sigmoidal dose-response function (variable slope), in Pipeline Pilot's dose-response component.

## Results

### Antimicrobial activity of MIITX<sub>1</sub>-Mg1a

Several previously described ant venom peptides have been shown to have antimicrobial activity (20), and therefore we examined the potential utility of MIITX<sub>1</sub>-Mg1a as an antimicrobial. MIITX<sub>1</sub>-Mg1a was tested on a range of available microbial strains (**Table S2**). The peptide caused complete growth inhibition of the fungus *Cryptococcus neoformans* var. *grubii*, with an MIC of 2.5 µM. At the highest concentration tested (10.2 µM), it also partially inhibited growth of the bacteria *Staphylococcus aureus* and *Acinetobacter baumannii*, with 84 and 32% inhibition, respectively, but had no effect on the bacteria *Escherichia coli*, *Klebsiella pneumoniae*, *Pseudomonas aeruginosa*, or the fungus *Candida albicans*. At the highest concentration tested (10.2 µM), MIITX<sub>1</sub>-Mg1a was not haemolytic (to human red blood cells), but it did display partial toxicity (49.1% growth inhibition) of HEK293 cells.

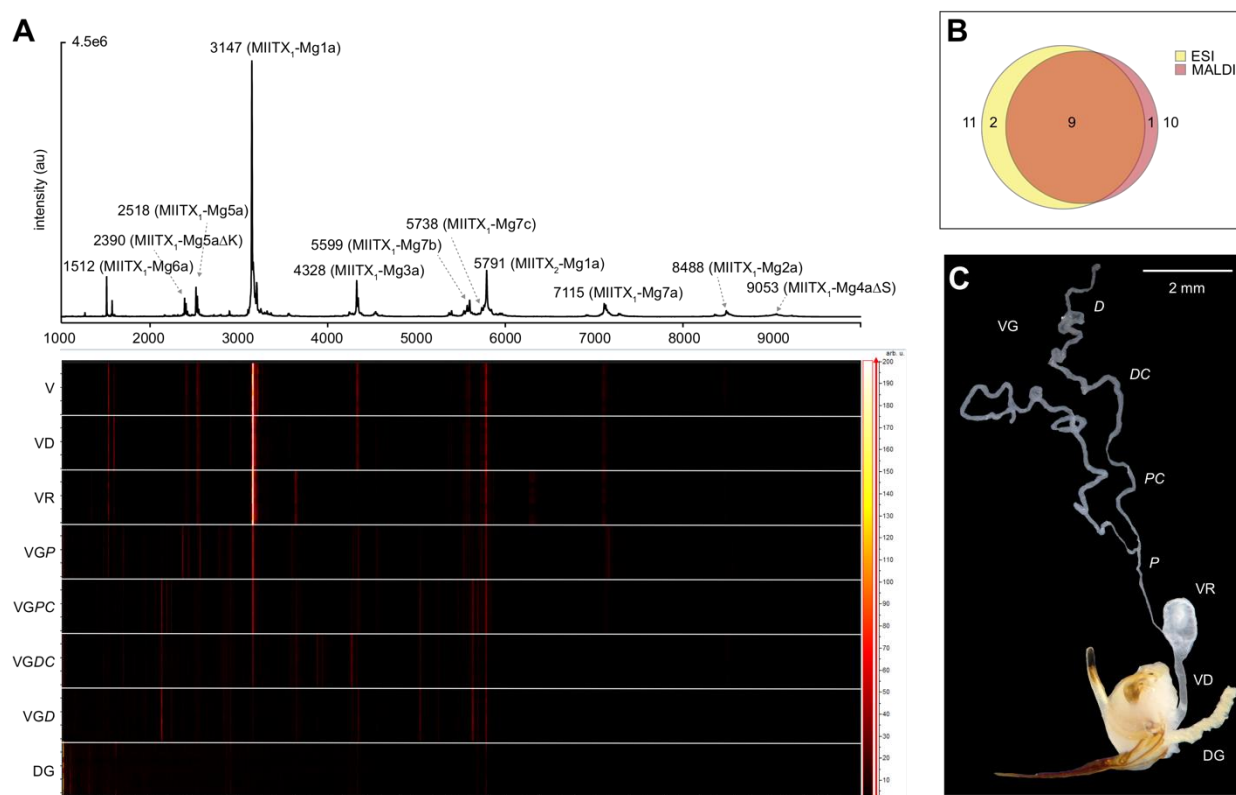

**Fig. S1. MALDI-MS analysis of *M. gulosa* venom apparatus.** (A) MALDI spectrum, generated in linear positive mode, of *M. gulosa* venom. Peaks corresponding to peptides identified as venom components by combined ESI-MS/transcriptomics are labelled. Theoretical  $MH_{av}^{+1}$  for each peptide are as follows: MIITX<sub>1</sub>-Mg6a, 1511.9; MIITX<sub>1</sub>-Mg5aΔK, 2390.9; MIITX<sub>1</sub>-Mg5a, 2519.1; MIITX<sub>1</sub>-Mg1a, 3147.8; MIITX<sub>1</sub>-Mg3a, 4329.0; MIITX<sub>1</sub>-Mg7b, 5600.4; MIITX<sub>1</sub>-Mg7c, 5740.6; MIITX<sub>2</sub>-Mg1a, 5792.3; MIITX<sub>1</sub>-Mg7a, 7116.3; MIITX<sub>1</sub>-Mg2a, 8489.4; MIITX<sub>1</sub>-Mg4aΔS, 9054.1. Gel view (prepared in ClinProTools) illustrates variation across 10 individual shots of samples prepared from venom (V), venom duct (VD), venom reservoir (VR), Dufour's gland (DG) and 4 sections of the venom glands: proximal (VGP), proximal central (VGPC), distal central (VGDC) and distal (VGD). (B) Venn diagram illustrating overlap in peptides identified using different MS techniques. (C) Venom apparatus of *M. gulosa*, labelled as above.

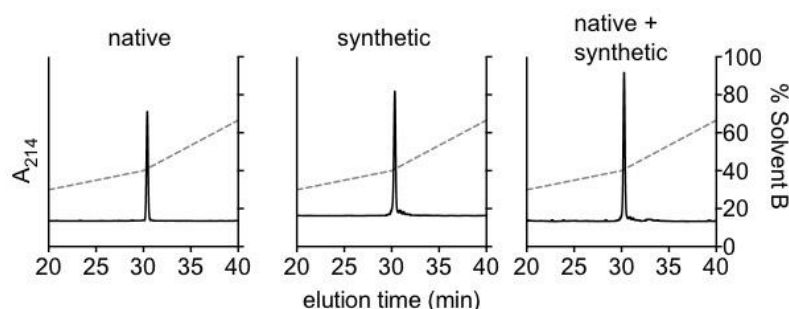

**Fig. S2. Coelution of native (purified from venom) and synthetic MIITX<sub>1</sub>-Mg1a.** RP-HPLC was performed using a Phenomenex Gemini NX-C<sub>18</sub> column (250 x 4.6 mm, 3 μm particle size, 110 Å pore size) with a gradient of 15–45% solvent B (90% ACN, 0.05% TFA) over 30 min.

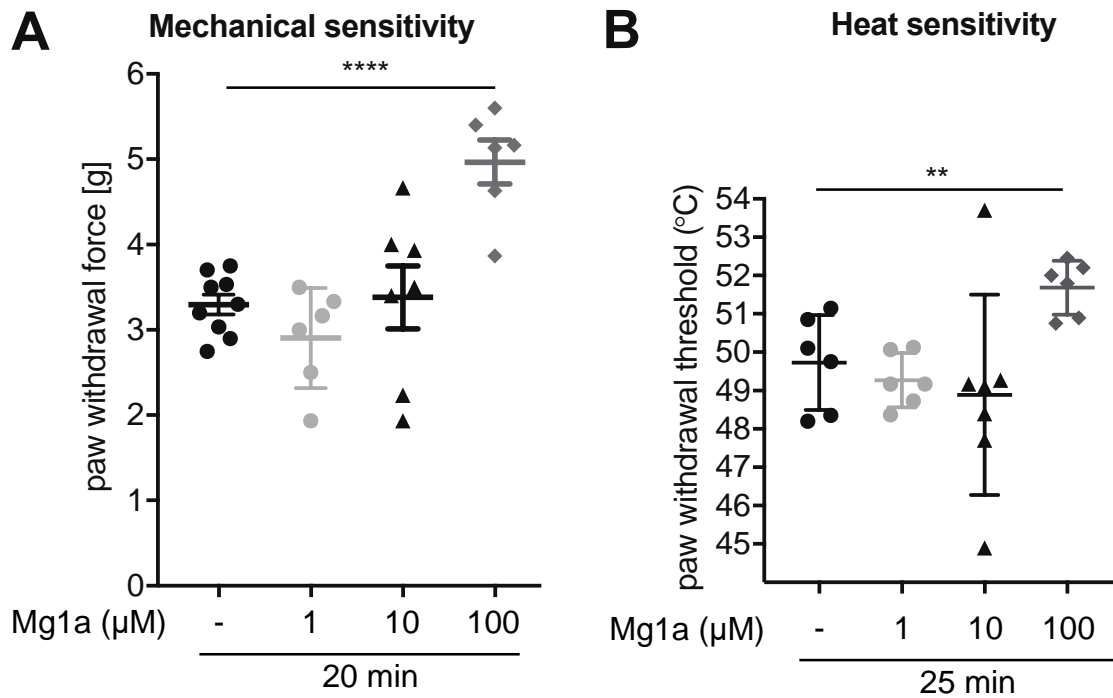

**Fig. S3. MIITX<sub>1</sub>-Mg1a-induced changes in paw withdrawal.** (A) At a concentration of 100 μM, MIITX<sub>1</sub>-Mg1a had caused mechanical sensitivity (at 20 min post-injection),  $n = 3-9$  per group. (B) MIITX<sub>1</sub>-Mg1a (100 μM) caused heat sensitivity (at 25 min post-injection).  $n = 6-7$  per group. Data are expressed as mean  $\pm$  SEM. Statistical significance compared to vehicle controls was determined using one-way ANOVA with Dunnett's multiple comparison test. \*\*  $p < 0.01$ , \*\*\*\*  $p < 0.0001$ .

**Table S1. Venom- or toxin-associated annotation of nonvenom component transcripts.**

| <b>UniProt Entry</b> | <b>Protein name</b>                                  | <b>Organism</b>                   | <b>TPM</b> |
|----------------------|------------------------------------------------------|-----------------------------------|------------|
| <b>A7X3V4</b>        | Kunitz-type serine protease inhibitor kunitoxin-Tell | <i>Telescopus dhara</i>           | 269.55     |
| <b>B2D0J5</b>        | Venom carboxylesterase-6                             | <i>Apis mellifera</i>             | 203.1      |
| <b>C9WMM5</b>        | Venom serine carboxypeptidase                        | <i>Apis mellifera</i>             | 152.1      |
| <b>Q58L94</b>        | Venom prothrombin activator notecarin-D2             | <i>Notechis scutatus scutatus</i> | 85.64      |
| <b>Q58L94</b>        | Venom prothrombin activator notecarin-D2             | <i>Notechis scutatus scutatus</i> | 70.75      |
| <b>B2D0J5</b>        | Venom carboxylesterase-6                             | <i>Apis mellifera</i>             | 54.33      |
| <b>B5U2W0</b>        | Venom serine protease Bi-V                           | <i>Bombus ignitus</i>             | 35.14      |
| <b>Q8T0W5</b>        | PIMHY Cysteine-rich venom protein 1                  | <i>Pimpla hypochondriaca</i>      | 29.79      |
| <b>P35779</b>        | Venom allergen 3                                     | <i>Solenopsis richteri</i>        | 27.35      |
| <b>A7X3V4</b>        | Kunitz-type serine protease inhibitor kunitoxin-Tell | <i>Telescopus dhara</i>           | 19.98      |
| <b>Q8MQS8</b>        | Venom serine protease 34                             | <i>Apis mellifera</i>             | 19.82      |
| <b>B5AJT4</b>        | Venom metalloproteinase 3                            | <i>Eulophus pennicornis</i>       | 18.3       |
| <b>C9WMM5</b>        | Venom serine carboxypeptidase                        | <i>Apis mellifera</i>             | 15.79      |
| <b>B5AJT4</b>        | Venom metalloproteinase 3                            | <i>Eulophus pennicornis</i>       | 13.95      |
| <b>Q8MQS8</b>        | Venom serine protease 34                             | <i>Apis mellifera</i>             | 13.06      |
| <b>Q8JI39</b>        | Cysteine-rich venom protein triflin                  | <i>Protobothrops flavoviridis</i> | 10.95      |
| <b>B5AJT4</b>        | Venom metalloproteinase 3                            | <i>Eulophus pennicornis</i>       | 6.8        |
| <b>B5AJT4</b>        | Venom metalloproteinase 3                            | <i>Eulophus pennicornis</i>       | 6.71       |
| <b>B5AJT4</b>        | Venom metalloproteinase 3                            | <i>Eulophus pennicornis</i>       | 6.63       |
| <b>P0DM55</b>        | Venom peptide SjAPI                                  | <i>Scorpiops jendeki</i>          | 5.64       |
| <b>Q8MQS8</b>        | Venom serine protease 34                             | <i>Apis mellifera</i>             | 5.05       |
| <b>B5AJT4</b>        | Venom metalloproteinase 3                            | <i>Eulophus pennicornis</i>       | 4.94       |
| <b>P505486</b>       | Conopressin                                          | <i>Conus geographus</i>           | 3.95       |
| <b>B5AJT4</b>        | Venom metalloproteinase 3                            | <i>Eulophus pennicornis</i>       | 3.35       |
| <b>P35775</b>        | Venom allergen 2                                     | <i>Solenopsis invicta</i>         | 1.61       |

**Table S2. Assessment of antimicrobial, cytotoxic and hemolytic activity of MIITX<sub>1</sub>-Mg1a.**

| <b>Bacterium</b>                                     | <b>Strain</b>    | <b>Organism</b> | <b>Max response<br/>± SEM</b> | <b>MIC (μM)</b>           |
|------------------------------------------------------|------------------|-----------------|-------------------------------|---------------------------|
| <i>Staphylococcus aureus</i>                         | ATCC 43300       | Bacterium       | 84 ± 0                        | 10.2                      |
| <i>Escherichia coli</i>                              | ATCC 25922       | Bacterium       | −1 ± 2                        | >10.2                     |
| <i>Klebsiella pneumoniae</i>                         | ATCC 700603      | Bacterium       | 16 ± 1                        | >10.2                     |
| <i>Acinetobacter baumannii</i>                       | ATCC 19606       | Bacterium       | 32 ± 3                        | >10.2                     |
| <i>Pseudomonas aeruginosa</i>                        | ATCC 27853       | Bacterium       | 4 ± 4                         | >10.2                     |
| <i>Candida albicans</i>                              | ATCC 90028       | Fungus          | 8 ± 4                         | >10.2                     |
| <i>Cryptococcus neoformans</i><br><i>var. grubii</i> | H99; ATCC 208821 | Fungus          | 108 ± 6                       | 2.5                       |
|                                                      |                  |                 |                               |                           |
| <b>Human embryonic<br/>kidney cells</b>              | ATCC CRL-1573    | Human           | 49 ± 7                        | 8.8 (CC <sub>50</sub> )   |
| <b>Human red blood cells</b>                         |                  | Human           | 10 ± 1                        | >10.2 (HC <sub>50</sub> ) |

MIC, minimum inhibitory concentration; CC<sub>50</sub>, concentration at 50% cytotoxic activity; HC<sub>50</sub>, concentration at 50% haemolytic activity.
